# Supplementary material for: Risk Perceptions, Knowledge and Behaviors of General and High-Risk Adult Populations towards COVID-19: A Systematic Scoping Review
Source: medRxiv preprint, doi:10.1101/2021.02.09.21250257, version 1 (2021-02-12)
Supplement: Supplementary file 2- Quality appraisal [file 250257_file03.pdf]

## Appendix 2: Quality appraisal of the included studies

[illegible]
